# Supplementary material for: Modulation of ligand conjugation for efficient FAPbBr3 based green light-emitting diodes
Source: Royal Society of Chemistry journal article supplement (doi:10.1039/c9qm00768g), 2020-01-01
Supplement: c9qm00768g1.pdf [file c9qm00768g1.pdf]

## Supporting Information

# Modulation of Ligands Conjugation for Efficient FAPbBr<sub>3</sub> based Green Light-Emitting Diodes

*Feng Zhang, Mengna Sun, Xiyu Luo, Dongdong Zhang, \* Lian Duan\**

Key Lab of Organic Optoelectronics and Molecular Engineering of Ministry of  
Education, Department of Chemistry, Tsinghua University, Beijing 100084, China

### Corresponding Author

\* E-mail: [duanl@mail.tsinghua.edu.cn](mailto:duanl@mail.tsinghua.edu.cn)

\* E-mail: [ddzhang@mail.tsinghua.edu.cn](mailto:ddzhang@mail.tsinghua.edu.cn)

## Experiment Section

**Materials.** Lead bromide ( $\text{PbBr}_2$ , 99.5%, Alfa Aesar); Formamidinium bromide (FABr,  $\geq 99.5\%$ , four times purification, Xi'an Polymer Light Technology Co. Ltd.); 1-(1-naphthyl)ethylamine (NEA,  $\geq 98.5\%$ , Alfa Aesar); Hydrobromic acid (HBr, 49 wt.% in water, Alfa Aesar); N, N-dimethylformamide (DMF, ultra-dry solvent, J&K Scientific Ltd.); Chlorobenzene (ultra-dry solvent, J&K Scientific Ltd.); Toluene (analytical grade, Beijing Chemical Reagent Co. Ltd., China); Absolute ethanol (analytical grade, Beijing Chemical Reagent Co., Ltd., China); Diethyl ether (analytical grade, Beijing Chemical Reagent Co., Ltd., China); Acetone (analytical grade, Beijing Chemical Reagent Co., Ltd., China); Poly(3,4-ethylenedioxythiophene):poly(styrenesulfonate) (PEDOT:PSS, Xi'an Polymer Light Technology Co. Ltd.); Poly[(9,9-dioctylfluorenyl-2,7-diyl)-co-(4,4'-(N-(p-butylphenyl))diphenylamine)] (TFB, Xi'an Polymer Light Technology Co. Ltd.); 2,2',2''-(1,3,5-Benzinetriyl)-tris(1-phenyl-1-H-benzimidazole) (TPBi, Jilin Optical and Electronic Materials Co. Ltd.); Lithium fluoride ( $\text{LiF}$ , 99%, Alfa Aesar); Aluminum ( $\text{Al}$ , Sinopharm Chemical Reagent Co. Ltd.); All reagents were used as received without further purification.

**Synthesis of 1-(1-naphthyl)ethylamine bromide.** 1-(1-naphthyl)ethylamine bromide (NEABr) was synthesized by reaction of NEA with HBr. Typically, 1 mL of NEA was dispersed in 10 mL of absolute ethanol, which was stirred and cooled to 273 K. 920  $\mu\text{L}$  of HBr was then added into the mixture to initiate the reaction. After stirred for two hours, the reaction solution was rotary evaporated to get rid of the solvent with pressure of -0.1 Mpa at 323 K. The obtained products were dissolved in absolute ethanol and further precipitated by diethyl ether for three times. Finally, the resulted pure white precipitates were collected and dried under vacuum (323 K, 5h) for future use.

**Preparation of perovskite precursor solution.** 0.2 mmol  $\text{PbBr}_2$ , 0.2 mmol FABr, and a certain amount of NEABr were mixed in a 5 mL vial. The molar ratio between  $\text{PbBr}_2$  and NEABr was indicated as 1:x, where x was varied from 0.2, 0.3, 0.4 to 0.5. Then, the mixture

was transferred into a glove box with 1 mL of DMF added. The solution was stirred over 2 h at 50 °C for further use.

**Fabrication of EL Devices.** ITO substrates were sequentially washed with toluene, acetone, ethanol and deionized water, followed by O<sub>2</sub> plasma treatment for 2 min. PEDOT:PSS solution was spin coated on the ITO substrate at 4000 rpm for 1 min, then baked on a hot plate at 150 °C for 15 min. TFB dissolved in chlorobenzene (6 mg/mL) was spin coated on the PEDOT:PSS film at 4000 rpm for 1 min, followed by thermal annealing at 120 °C for 20 min. The TFB film was treated with O<sub>2</sub> plasma for 2 min and transferred into the glove box. FAPbBr<sub>3</sub> precursor solution was spread out on the TFB film and spin coated at 4000 rpm for 1 min. During the spin coating of precursor solution, 0.5 mL toluene was dropped one second before the color change. The obtained FAPbBr<sub>3</sub> film was annealed at 60 °C for 5 min to remove residual solvent and enhance the crystallinity. Then, TPBi (25 nm), LiF (1 nm), and Al (80 nm) layers were thermally deposited in sequence in a high-vacuum chamber (pressure below  $8 \times 10^{-5}$  Pa) with deposition rate of 0.5, 0.05, and 5 Å/s, respectively.

**Characterizations and device measurements.** The SEM images of FAPbBr<sub>3</sub> PeNCs films were recorded on Hitachi S-4800 microscope, working at 5 kV. X-ray diffraction patterns (XRD) were measured on a Bruker/D8 FOCUS X-ray diffractometer with Cu K $\alpha$  radiation source (wavelength at 1.5406 Å). The samples were scanned from 3°<2 $\theta$ <60° at an increment of 2°/min. The TEM images were captured on a JEOL-JEM 2100F TEM machine operating at an acceleration voltage of 200 kV. FAPbBr<sub>3</sub> PeNCs films were stripped from TFB substrate and dissolved in chlorobenzene for further TEM measurements. UV-Vis absorption spectra were measured on a UV-6100 UV-Vis spectrophotometer (Shanghai Mapada Instruments Co.,Ltd., China). PL spectra were taken using a F-380 fluorescence spectrometer (Tianjin Gangdong Sci. & Tech. Development. Co., Ltd., China). Time-resolved PL was collected using fluorescence lifetime measurement system (C11367-11, Hamamatsu Photonics, Japan) with excitation

wavelength of 405 nm. The absolute PLQYs of as fabricated FAPbBr<sub>3</sub> films were determined using a fluorescence spectrometer with integrated sphere (C9920-02, Hamamatsu Photonics, Japan) under blue light emitting diodes (LED) excited at a wavelength of 450 nm. The electrical characteristics, electroluminescence spectra, and luminance of the devices were measured with a Keithley 2400 source meter in conjunction with an absolute EQE measurement system (C9920-12, Hamamatsu Photonics K.K., Japan). All the characterizations were performed at room temperature under ambient laboratory conditions.

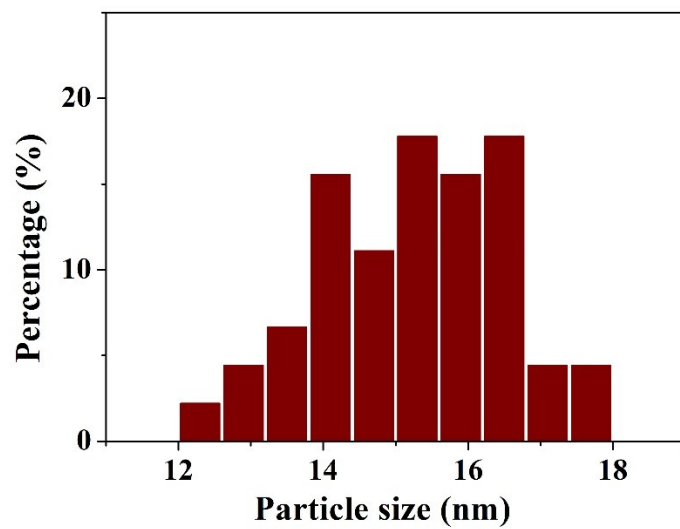

**Figure S1.** Statistical analysis on particle size corresponding to TEM images of sample 40%.

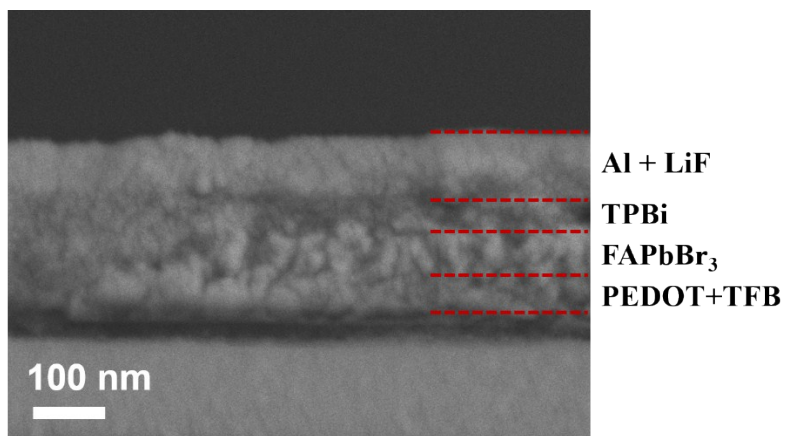

**Figure S2.** Cross section SEM image of of a typical EL device.

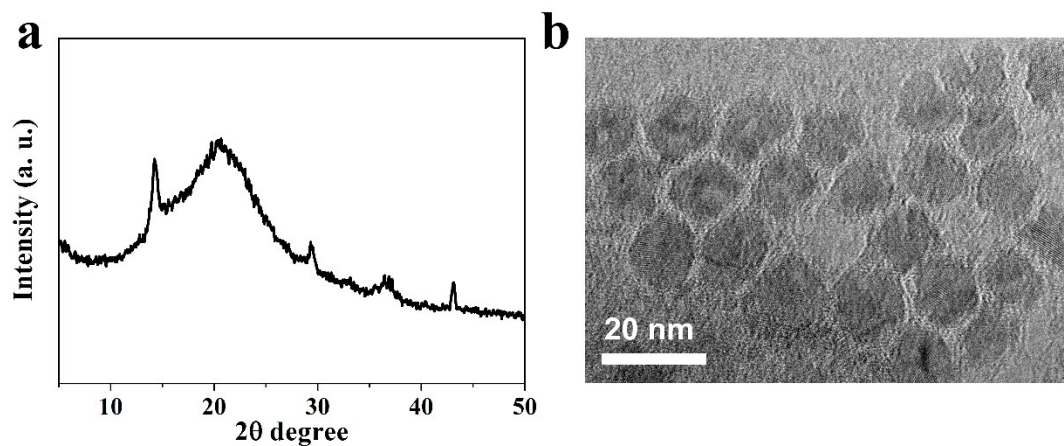

**Figure S3.** (a) XRD pattern of FAPbBr<sub>3</sub> PeNCs films fabricated by using PEABr molecules. (b) TEM image of FAPbBr<sub>3</sub> PeNCs films fabricated by PEABr.

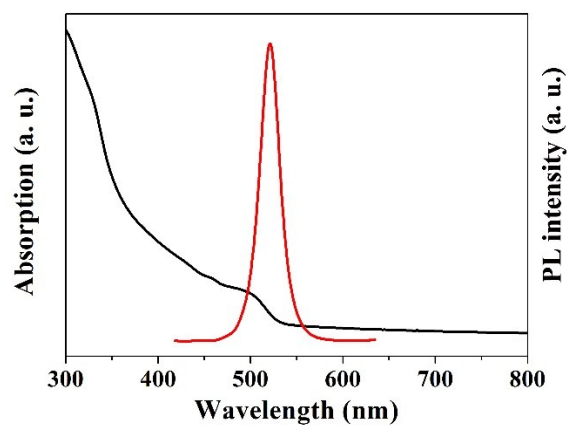

**Figure S4.** Absorption and emission spectra of FAPbBr<sub>3</sub> PeNCs films fabricated using PEABr.

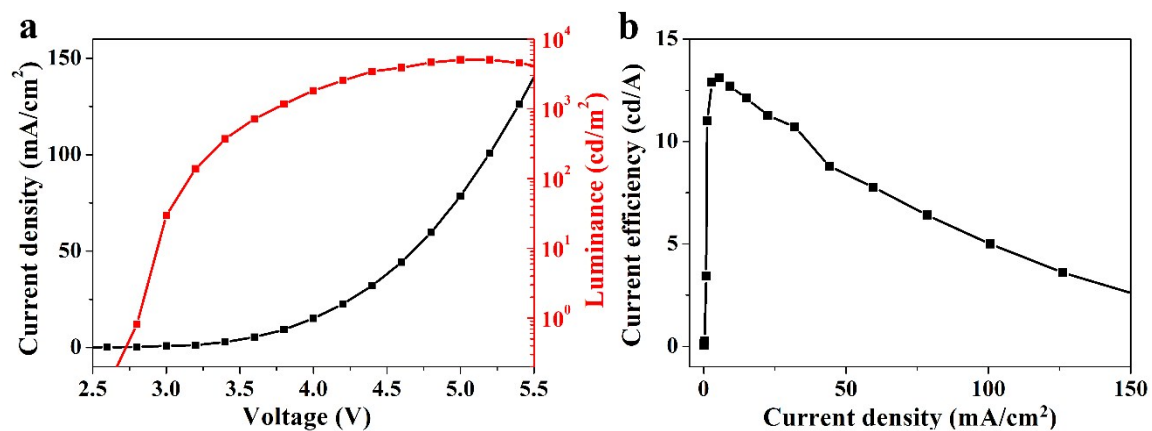

**Figure S5.** (a) Current density-Voltage-Luminance curves of a typical EL device base on  $\text{FAPbBr}_3$  PeNCs films fabricated by using PEABr. (b) The corresponding EQE curve.

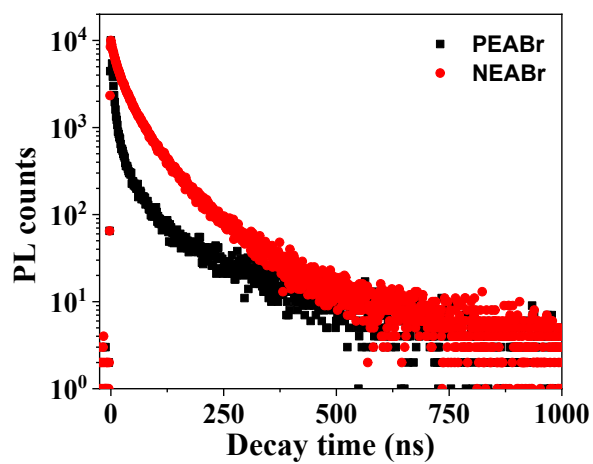

**Figure S6.** Comparison between time resolved PL decay curves of  $\text{FAPbBr}_3$  PeNCs films capped by NEABr and PEABr.

**Table S1.** The detailed fitting results of sample 20%, 30%, 40% and 50%.

| Sample      | 20%    | 30%   | 40%   | 50%   |
|-------------|--------|-------|-------|-------|
| $A_1$       | 9679   | 4238  | 3634  | 3023  |
| $A_2$       | 1094   | 4731  | 4933  | 5234  |
| $A_3$       | 113    | 1563  | 1614  | 1743  |
| $\tau_1$    | 3.40   | 3.85  | 6.09  | 7.61  |
| $\tau_2$    | 22.17  | 23.80 | 26.54 | 28.66 |
| $\tau_3$    | 151.12 | 71.73 | 89.77 | 90.21 |
| $\tau_{av}$ | 43.49  | 44.74 | 55.77 | 56.50 |

**Table S2.** The operation parameters (turn on voltage ( $V_T$ ), maximum luminance ( $L_{max}$ ), EL peak, maximum current efficiency ( $CE_{max}$ ), and maximum EQE ( $EQE_{max}$ )) of EL devices based on sample 20%, 30%, 40% and 50%.

| Device | $V_T$ (V) | $L_{max}$ (cd/m <sup>2</sup> ) | EL peak (nm) | $CE_{max}$ (cd/A) | $EQE_{max}$ (%) |
|--------|-----------|--------------------------------|--------------|-------------------|-----------------|
| 20%    | 3.1       | 6386                           | 531          | 5.29              | 1.32            |
| 30%    | 3.0       | 14630                          | 529          | 16.58             | 3.93            |
| 40%    | 2.8       | 9944                           | 526          | 36.83             | 8.62            |
| 50%    | 2.6       | 5380                           | 522          | 24.27             | 5.78            |

**Table S3.** The calculated results of resistance and capacitance of EL devices based on PEABr and NEABr.

| Ligands | R (K $\Omega$ ) | $C_{LF}$ (nF) |
|---------|-----------------|---------------|
| PEABr   | 28.74           | 24.69         |
| NEABr   | 12.73           | 8.10          |
